# Supplementary material for: Pravastatin induces NO synthesis by enhancing microsomal arginine uptake in healthy and preeclamptic placentas
Source: BMC Pregnancy Childbirth. 2019 Nov 20;19:426. doi: 10.1186/s12884-019-2507-0 (PMC6868828; doi:10.1186/s12884-019-2507-0)
Supplement: Supplementary file 1 — Additional file 1. Detailed clinical data of participants. [file 12884_2019_2507_MOESM1_ESM.xls]

## Sheet: Munka1
	control											preclamptic
	mother age range	week of birth	fetus (g)	cesarean (yes:1, not:0)	syst blood pres. (mmHg)	diast. Blood pres.	urine protein	apgar 1 min	apgar 5 min	weight gain (kg)		mother age range	week of birth	fetus (g)	cesarean (yes:1, not:0)	syst blood pres. (mmHg)	diast. blood pres. (mmHg)	urine protein	apgar 1 min	apgar 5 min	weight gain (kg)
	30-35	40	3230	0	100	60	0	10	10	15		30-35	32	1700	1	170	110	++	9	9	9
	30-35	39	3640	1	100	70	0	9	10	15		25-30	37	3360	1	200	110	++	9	10	-8
	25-30	40	3560	1	105	80	0	10	10	9		25-30	37	2420	1	150	90	580	10	10	18
	30-35	40	3410	0	120	79	0	10	10	9		30-35	30	1210	1	150	100	++	8	9	7
	25-30	40	3440	0	115	75	0	10	10	10		25-30	34	1820	1	150	100	+	8	9	16
	20-24	40	3330	0	115	80	0	10	10	12		30-35	31	1450	1	160	110	++	7	8	8
	mother age	week of birth	fetus (g)	cesarean (yes:1, not:0)	syst blood pres. (mmHg)	diast. Blood pres.	urine protein	apgar 1 min	apgar 5 min	weight gain (kg)		mother age	week of birth	fetus (g)	cesarean (yes:1, not:0)	syst blood pres. (mmHg)	diast. blood pres.	urine protein	apgar 1 min	apgar 5 min	weight gain (kg)
average		39.8333	3435	0.333333	109.167	74	0	9.83333	10	11.6667			33.5	1993.33	1	163.333	103.333	580	8.5	9.16667	8.33333
SD		0.408248	149.231	0.516398	8.61201	7.87401	0	0.408248	0	2.80476			3.01662	784.185	0	19.6638	8.16497	#DIV/0!	1.04881	0.752773	9.17969
	29											29.2
	3.3											2.3
